# Supplementary material for: A comparative ab initio study to investigate the rich structural variety and electronic properties of GamTen (m = 1, 2 and n = 1–4) with analogous oxides, sulfides and selenides
Source: Royal Society of Chemistry journal article supplement (doi:10.1039/c5ra07594g), 2015-01-01
Supplement: c5ra07594g1.pdf [file c5ra07594g1.pdf]

SUPPORTING INFORMATION

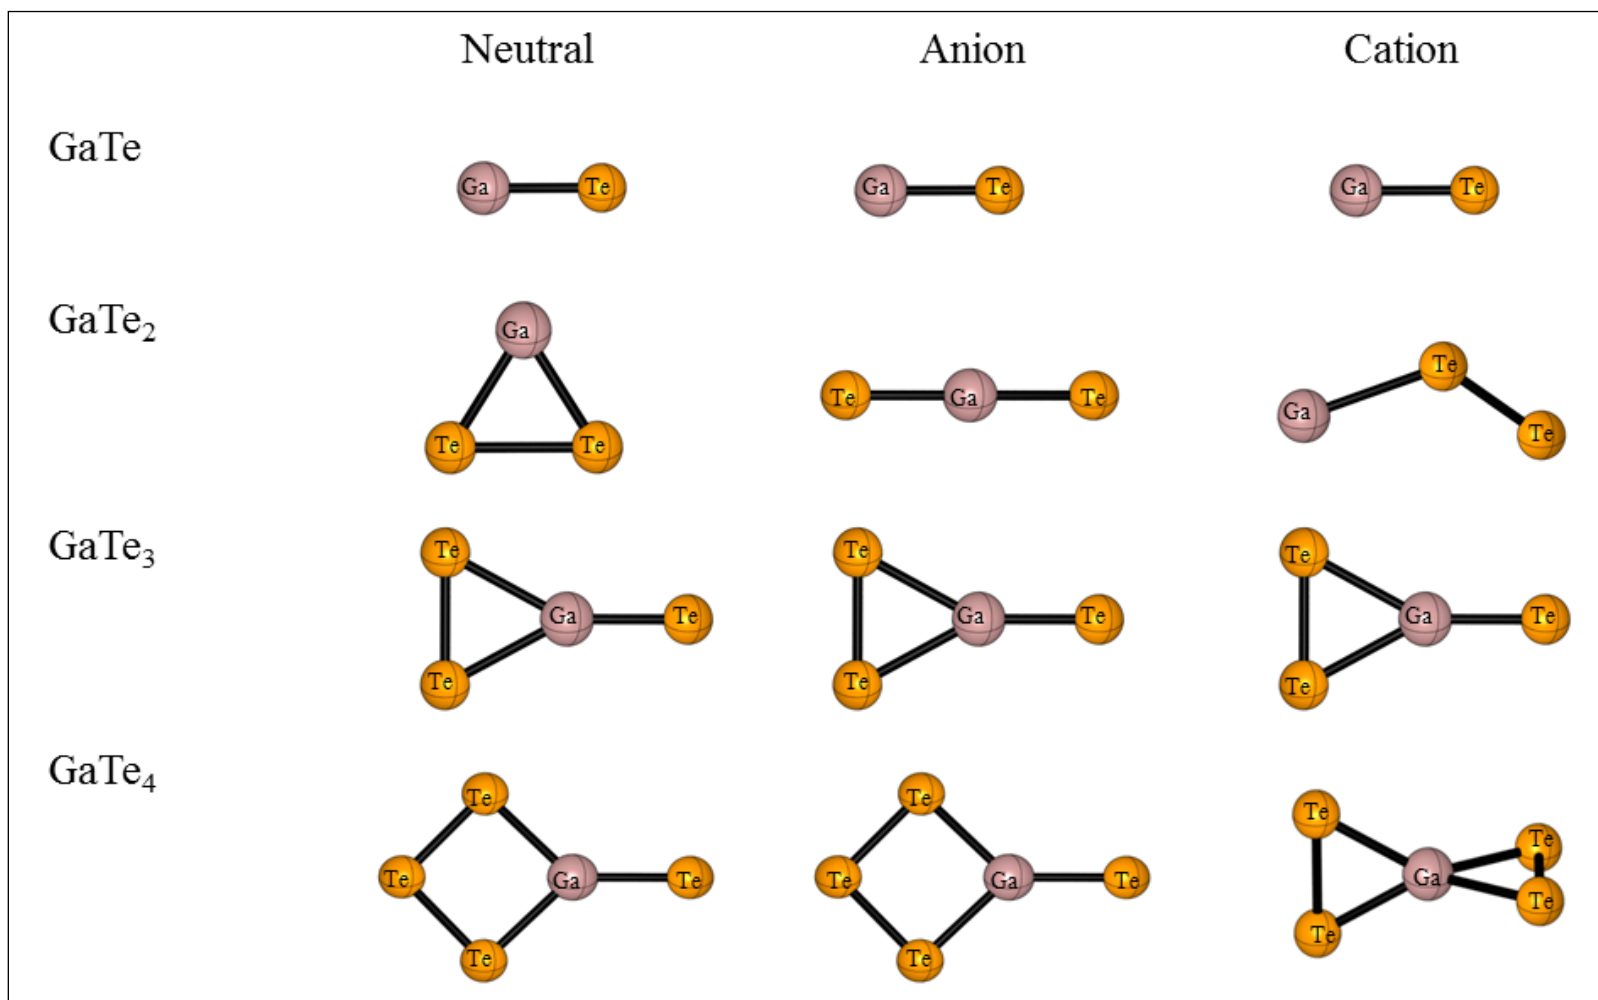

Fig. S1: Structural evolution from GaTe to GaTe<sub>4</sub>.

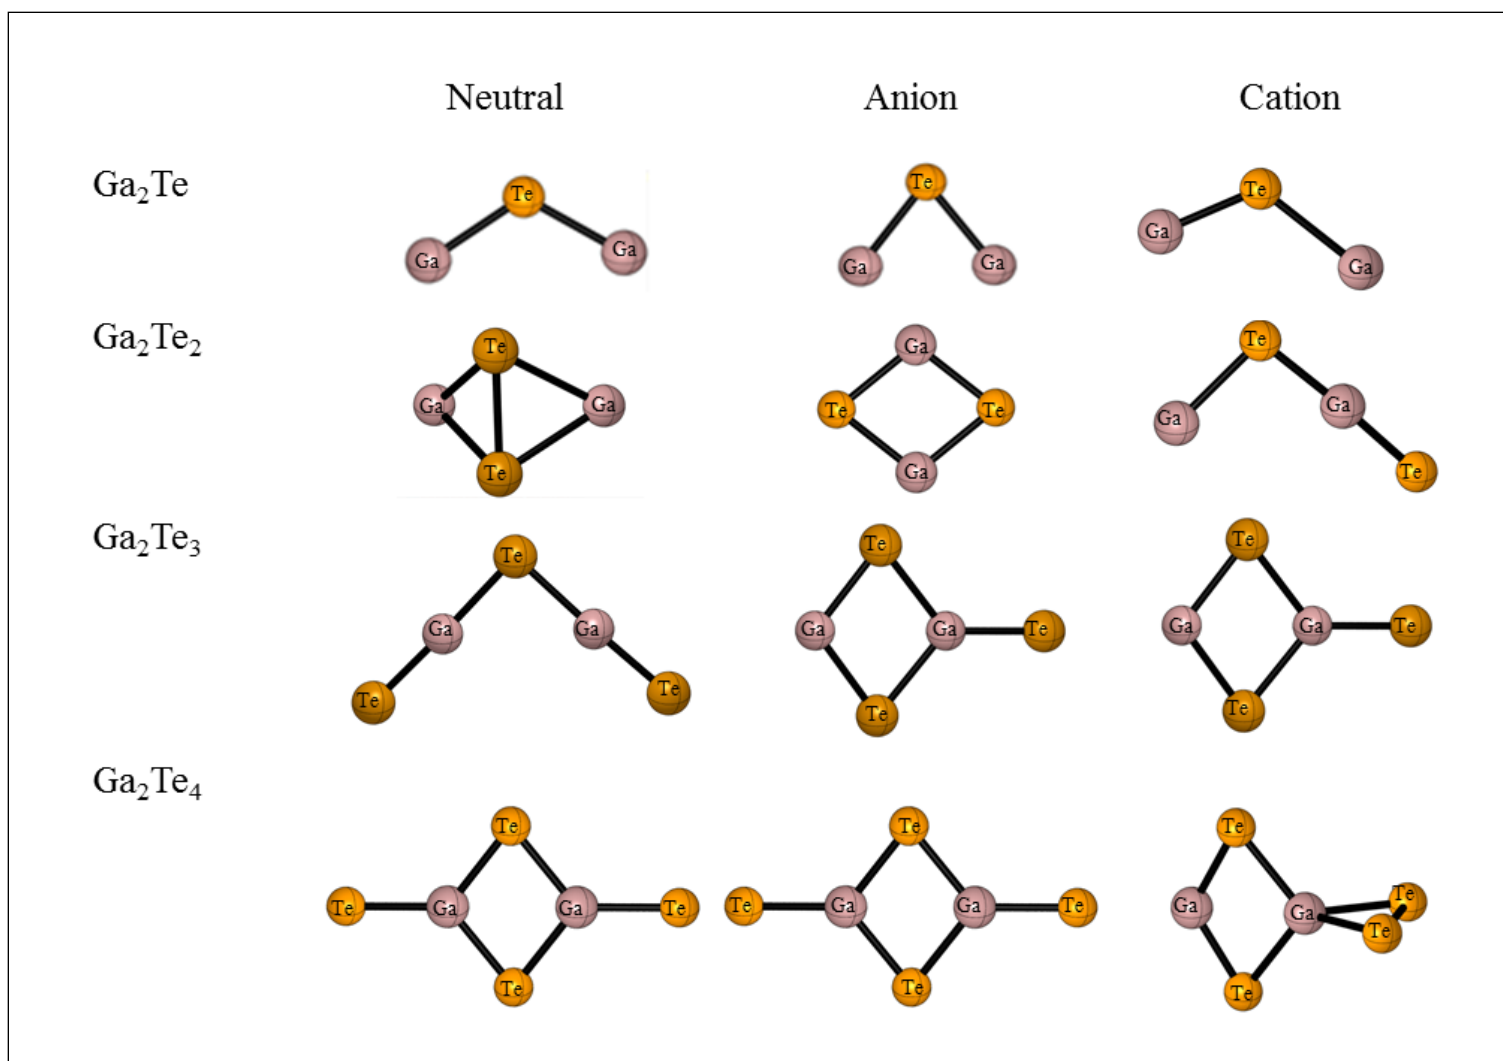

**Fig. S2:** Schematic diagram of the sequential addition of tellurium atom to  $\text{Ga}_2\text{Te}_n$  ( $n = 1-4$ ).

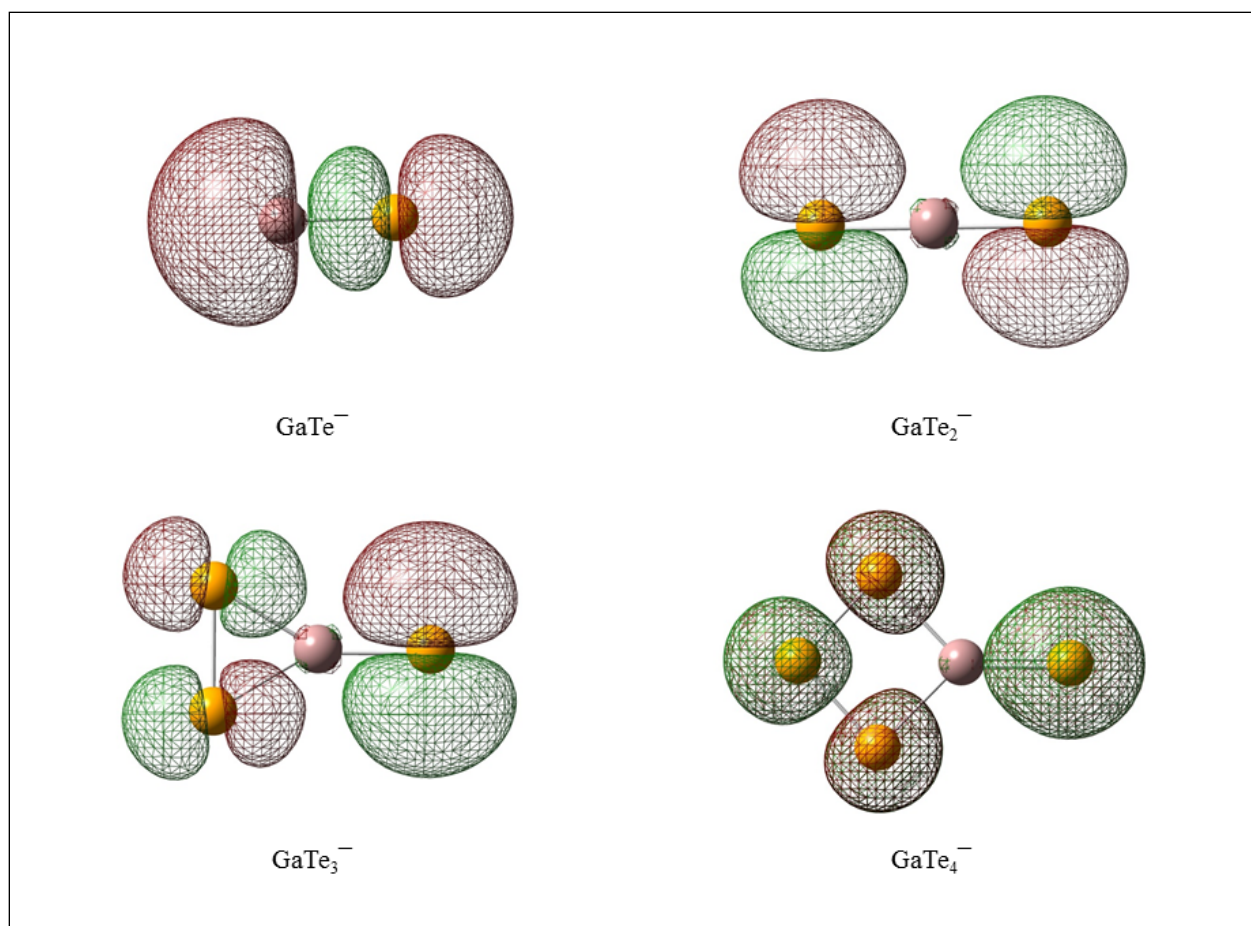

**Fig. S3:** Orbital accommodating the excess electron of anionic monogallium tellurides.

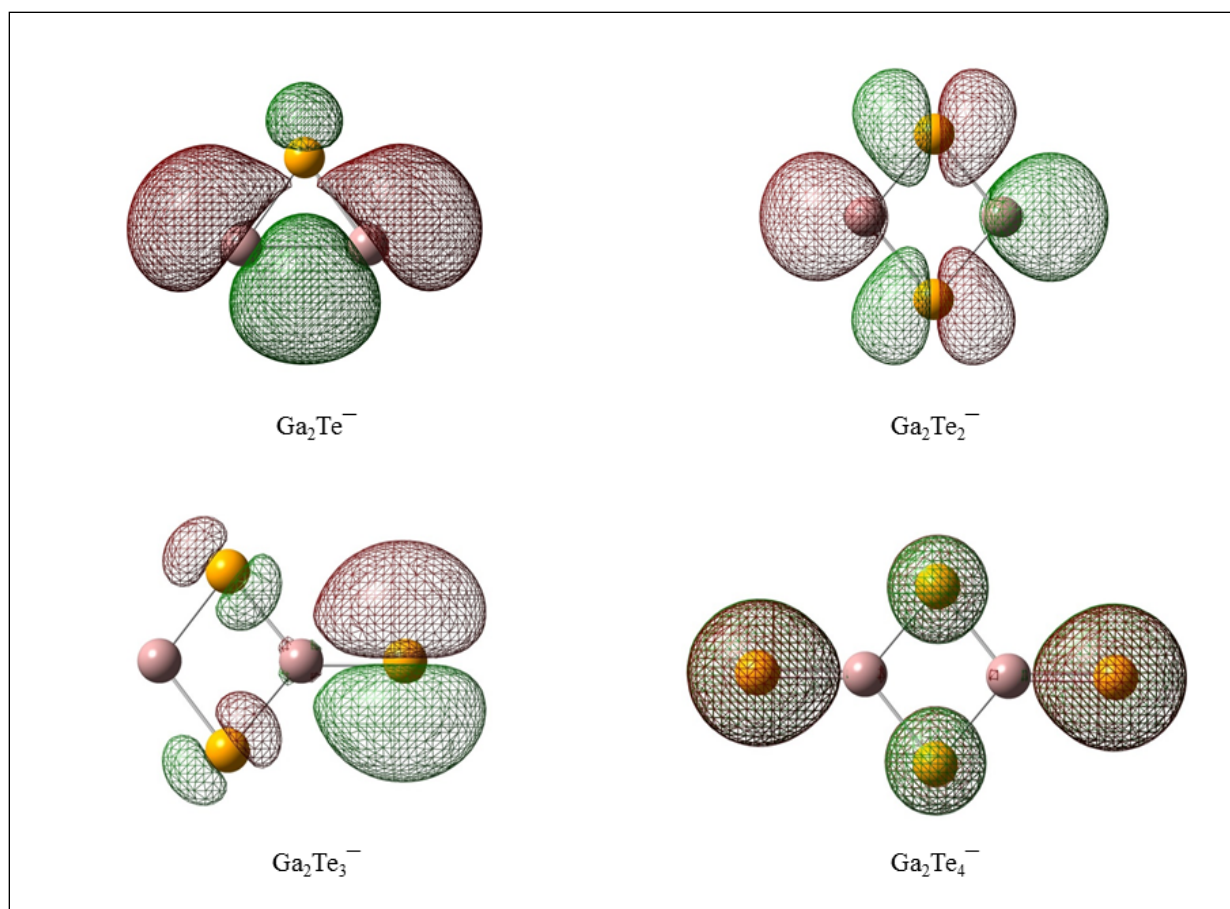

**Fig. S4:** Orbital accommodating the excess electron of anionic digallium tellurides.

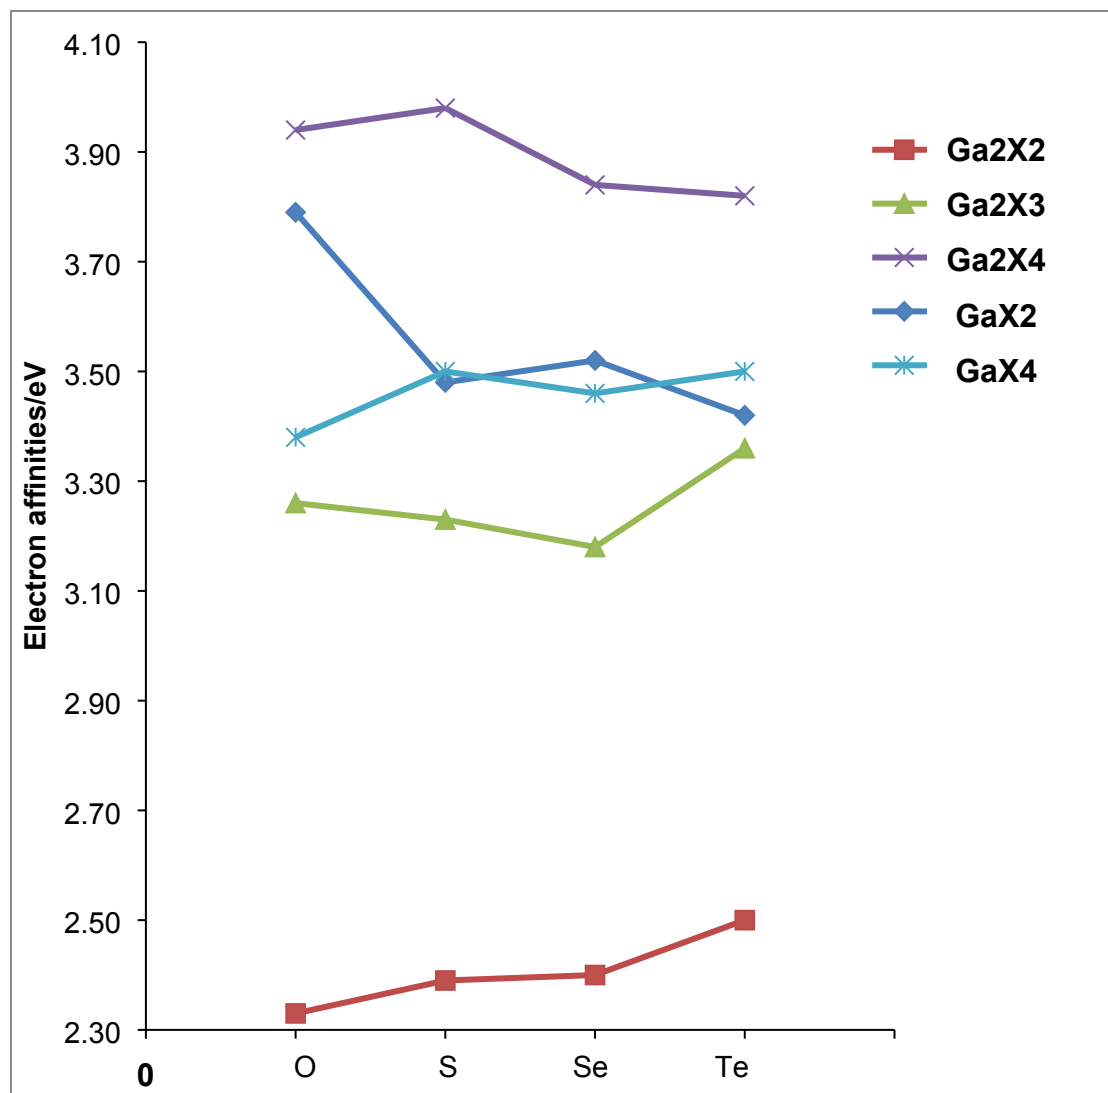

**Fig. S5:** Electron affinities of gallium chalcogenide ( $\text{Ga}_m\text{X}_n$  where  $\text{X} = \text{O}-\text{Te}$ ;  $m = 1, 2$  and  $n = 1-4$ ) [Ref: 12-17, 19-21, 22] clusters with the B3LYP functional.

**Table S1:** Internal coordinates of the ground state geometries, harmonic vibrational wavenumbers ( $\text{cm}^{-1}$ ), and energies (Hartree) at the B3P86 functional for  $\text{GaTe}_n$  ( $n = 1-4$ ) [Basis sets Ga: 6-311+G(2df) and Te: LANL2DZdp].

|                          |                                                         | <b>GaTe<sub>n</sub></b>                                                                                                                |                                                                                                                                        |                                                                    |
|--------------------------|---------------------------------------------------------|----------------------------------------------------------------------------------------------------------------------------------------|----------------------------------------------------------------------------------------------------------------------------------------|--------------------------------------------------------------------|
|                          |                                                         | <b>Neutral</b>                                                                                                                         | <b>Anion</b>                                                                                                                           | <b>Cation</b>                                                      |
| <b>n = 1</b>             |                                                         | Ga,0.,0.,-1.2595839389                                                                                                                 | Ga,0.,0.,-1.2994377662                                                                                                                 | Ga,0.,0.,-1.3813576298                                             |
|                          |                                                         | Te,0.,0.,1.1453449389                                                                                                                  | Te,0.,0.,1.1851987662                                                                                                                  | Te,0.,0.,1.2671186298                                              |
|                          | <b>v/cm<sup>-1</sup></b>                                | 257 ( $\sigma_g$ )                                                                                                                     | 251 ( $\sigma_g$ )                                                                                                                     | 149 ( $\sigma_g$ )                                                 |
|                          |                                                         | <b><i>E = -1933.762411</i></b>                                                                                                         | <b><i>E = -1933.879888</i></b>                                                                                                         | <b><i>E = -1933.438318</i></b>                                     |
| <b>n = 2</b>             |                                                         | Ga,0.0196844214,0.0087703118,0.                                                                                                        | Ga,0.,0.,0.                                                                                                                            | Ga,1.9938714296,-1.0281499257,0.                                   |
|                          |                                                         | Te,2.8581570318,-0.1835472564,0.                                                                                                       | Te,2.3958344846,0.,0.                                                                                                                  | Te,-1.9299871135,0.3220848359,0.                                   |
|                          |                                                         | Te,1.7748812491,2.2477872619,0.                                                                                                        | Te,-2.3958344846,0.,0.                                                                                                                 | Te,0.1102446838,1.2666777616,0.                                    |
|                          | <b>v/cm<sup>-1</sup></b>                                | 227 (a <sub>1</sub> ), 168 (a <sub>1</sub> ), 103 (b <sub>2</sub> )                                                                    | 362 ( $\sigma_u$ ), 168 ( $\sigma_g$ ), 81 ( $\pi_u$ ), 81 ( $\pi_u$ )                                                                 | 245 (a <sub>1</sub> ), 116 (a <sub>1</sub> ), 22 (a <sub>1</sub> ) |
|                          | <b><i>E = -1942.0140511</i></b>                         | <b><i>E = -1942.15485</i></b>                                                                                                          | <b><i>E = -1941.706663</i></b>                                                                                                         |                                                                    |
| <b>n = 3</b>             |                                                         | Ga,-0.5703826342,-0.0889610235,0.                                                                                                      | Ga,-0.1412926588,0.,-0.1381950146                                                                                                      | Ga,0.,0.,0.53804178                                                |
|                          |                                                         | Te,-2.8936172372,-0.4855113343,0.                                                                                                      | Te,0.4140581793,0.,2.3962119782                                                                                                        | Te,0.,0.,2.97550578                                                |
|                          |                                                         | Te,1.4613495696,1.6325820535,0.                                                                                                        | Te,2.4048004821,0.,0.3608471441                                                                                                        | Te,0.,1.36168314,-1.64812498                                       |
|                          |                                                         | Te,1.9191258619,-1.0314665456,0.                                                                                                       | Te,-1.8628317854,0.,-1.8219918003                                                                                                      | Te,0.,-1.36168314,-1.64812498                                      |
| <b>v/cm<sup>-1</sup></b> | 324 (a'), 219 (a'), 126 (a'), 84(a'), 72 (a''), 47 (a') | 330 (a <sub>1</sub> ), 185 (a <sub>1</sub> ), 144 (b <sub>2</sub> ), 127 (a <sub>1</sub> ), 82 (b <sub>1</sub> ), 60 (b <sub>2</sub> ) | 327 (a <sub>1</sub> ), 209 (a <sub>1</sub> ), 147 (b <sub>2</sub> ), 130 (a <sub>1</sub> ), 67 (b <sub>1</sub> ), 40 (b <sub>2</sub> ) |                                                                    |
|                          | <b><i>E = -1950.231676</i></b>                          | <b><i>E = -1950.37661</i></b>                                                                                                          | <b><i>E = -1949.943481</i></b>                                                                                                         |                                                                    |
| <b>n = 4</b>             |                                                         | Ga,0.,0.,0.9039406391                                                                                                                  | Ga,0.,0.,0.9618547991                                                                                                                  | Ga,0.,0.,0.                                                        |
|                          |                                                         | Te,0.,1.9725938675,0.7578249608                                                                                                        | Te,0.,1.9652275408,-0.7664876197                                                                                                       | Te,0.,1.3621366077,2.2010573856                                    |
|                          |                                                         | Te,0.,0.,-2.6580566915                                                                                                                 | Te,0.,0.,-2.7330345758                                                                                                                 | Te,0.,-1.3621366077,2.2010573856                                   |
|                          |                                                         | Te,0.,-1.9725938675,-0.7578249608                                                                                                      | Te,0.,-1.9652275408,0.7664876197                                                                                                       | Te,1.3621366077,0.,-2.2010573856                                   |
|                          |                                                         | Te,0.,0.,3.341575874                                                                                                                   | Te,0.,0.,3.3759649162                                                                                                                  | Te,-1.3621366077,0.,-2.2010573856                                  |

|                          |                                                                                                                                                                                                              |                                                                                                                                                                                                                 |                                                                                                                                                          |
|--------------------------|--------------------------------------------------------------------------------------------------------------------------------------------------------------------------------------------------------------|-----------------------------------------------------------------------------------------------------------------------------------------------------------------------------------------------------------------|----------------------------------------------------------------------------------------------------------------------------------------------------------|
| <b>v/cm<sup>-1</sup></b> | 263 (a <sub>1</sub> ), 215 (b <sub>2</sub> ), 187 (b <sub>2</sub> ), 183 (a <sub>1</sub> ),<br>143 (a <sub>1</sub> ), 89 (a <sub>1</sub> ), 71 (b <sub>1</sub> ), 40 (b <sub>2</sub> ), 32 (b <sub>1</sub> ) | 306 (a <sub>1</sub> ), 195 (b <sub>2</sub> ), 184 (a <sub>1</sub> ), 178 (b <sub>2</sub> ),<br>137 (a <sub>1</sub> ), 86 (a <sub>1</sub> ), 79 (b <sub>1</sub> ), 46 (b <sub>2</sub> ), 25<br>(b <sub>1</sub> ) | 319 (b <sub>2</sub> ), 217 (a <sub>1</sub> ), 201 (b <sub>2</sub> ), 143 (e),<br>143 (e), 109 (a <sub>1</sub> ), 51 (e), 51 (e), 36<br>(b <sub>1</sub> ) |
|                          | <i>E</i> = -1958.471755                                                                                                                                                                                      | <i>E</i> = -1958.611833                                                                                                                                                                                         | <i>E</i> = -1958.190907                                                                                                                                  |

---

**Table S2:** Internal coordinates of the ground state geometries, harmonic vibrational wavenumbers ( $\text{cm}^{-1}$ ), and energies (Hartree) at the B3P86 functional for  $\text{Ga}_2\text{Te}_n$  ( $n = 1-4$ ) [Basis sets Ga: 6-311+G(2df) and Te: LANL2DZdp].

|                                        | <b><math>\text{Ga}_2\text{Te}_n</math></b>                                                                                                                                   |                                                                                                                                                                               |                                                                                                                                                |
|----------------------------------------|------------------------------------------------------------------------------------------------------------------------------------------------------------------------------|-------------------------------------------------------------------------------------------------------------------------------------------------------------------------------|------------------------------------------------------------------------------------------------------------------------------------------------|
|                                        | <b>Neutral</b>                                                                                                                                                               | <b>Anion</b>                                                                                                                                                                  | <b>Cation</b>                                                                                                                                  |
| <b><math>n = 1</math></b>              | Te,-0.0899180282,-0.1379848132,0.<br>Ga,2.5309072261,0.0293016862,0.<br>Ga,-0.9953104577,2.3271671771,0.                                                                     | Te,-0.1648464147,-0.122581138,0.<br>Ga,2.5125864398,0.1155020146,0.<br>Ga,0.8339080402,2.3729788826,0.                                                                        | Te,-0.0717970208,-0.1575930904,0.<br>Ga,2.8422288477,0.046545608,0.<br>Ga,-0.9614679469,2.1878048425,0.                                        |
| <b><math>\nu/\text{cm}^{-1}</math></b> | 204 ( $b_2$ ), 195 ( $a_1$ ), 37 ( $a_1$ )                                                                                                                                   | 205 ( $a_1$ ), 141 ( $b_2$ ), 104 ( $a_1$ )                                                                                                                                   | 159 ( $a_1$ ), 123 ( $a_1$ ), 39 ( $a_1$ )                                                                                                     |
|                                        | <b><math>E = -3859.381883</math></b>                                                                                                                                         | <b><math>E = -3859.452615</math></b>                                                                                                                                          | <b><math>E = -3859.079897</math></b>                                                                                                           |
| <b><math>n = 2</math></b>              | Ga,0.,2.0201678167,0.7525642224<br>Te,-1.3872637169,0.,-0.6930192224<br>Te,1.3872637169,0.,-0.6930192224<br>Ga,0.,-2.0201678167,0.7525642224                                 | Ga,0.,0.,-1.6598399969<br>Te,0.,2.100675463,0.<br>Te,0.,-2.100675463,0.<br>Ga,0.,0.,1.6598399969                                                                              | Ga,0.1481846634,-0.1771972945,0.<br>Te,6.1850375779,-0.1824673134,0.<br>Te,1.929502661,2.1265990662,0.<br>Ga,4.0249634277,0.9540814717,0.      |
| <b><math>\nu/\text{cm}^{-1}</math></b> | 205 ( $a_1$ ), 170 ( $b_2$ ), 155 ( $a_1$ ), 118 ( $b_1$ ),<br>87 ( $a_2$ ), 49 ( $a_1$ )                                                                                    | 194 ( $b_{1u}$ ), 176 ( $a_g$ ), 150 ( $b_{3g}$ ), 92 ( $a_g$ ),<br>47 ( $b_{2u}$ ), 39 ( $b_{3u}$ )                                                                          | 336 ( $a'$ ), 157 ( $a'$ ), 134 ( $a'$ ), 76 ( $a'$ ),<br>60 ( $a''$ ), 24 ( $a'$ )                                                            |
|                                        | <b><math>E = -3867.625797</math></b>                                                                                                                                         | <b><math>E = -3867.734132</math></b>                                                                                                                                          | <b><math>E = -3867.323724</math></b>                                                                                                           |
| <b><math>n = 3</math></b>              | Te,0.0430490165,0.,0.0491485273<br>Ga,-0.0544892855,0.,2.5613484797<br>Ga,2.546203716,0.,0.2834109273<br>Te,-0.2012191029,0.,4.8834988783<br>Te,4.8674455702,0.,0.4438739041 | Ga,0.0000000002,0.,-0.1418949722<br>Ga,0.0000000002,0.,3.0239620179<br>Te,2.0790915951,0.,1.3945525318<br>Te,-2.0790915947,0.,1.3945525318<br>Te,0.0000000002,0.,5.4490507456 | Ga,0.,0.,0.1600858976<br>Ga,0.,0.,2.9025740244<br>Te,2.1510641313,0.,1.3440684857<br>Te,-2.1510641313,0.,1.3440684857<br>Te,0.,0.,5.3694259636 |
| <b><math>\nu/\text{cm}^{-1}</math></b> | 372 ( $a_1$ ), 361 ( $b_2$ ), 162 ( $a_1$ ), 151 ( $b_2$ ),<br>84 ( $a_1$ ), 68 ( $b_1$ ), 62 ( $a_2$ ), 55 ( $b_2$ ), 14 ( $a_1$ )                                          | 293 ( $a_1$ ), 235 ( $b_2$ ), 190 ( $a_1$ ), 158 ( $b_2$ ),<br>131 ( $a_1$ ), 91 ( $b_1$ ), 81 ( $a_1$ ), 43 ( $b_2$ ), 32<br>( $b_1$ )                                       | 310 ( $b_2$ ), 295 ( $a_1$ ), 209 ( $a_1$ ), 166 ( $b_2$ ),<br>123 ( $a_1$ ), 109 ( $a_1$ ), 84 ( $b_1$ ), 50 ( $b_1$ ),<br>38 ( $b_2$ )       |
|                                        | <b><math>E = -3875.852304</math></b>                                                                                                                                         | <b><math>E = -3875.988792</math></b>                                                                                                                                          | <b><math>E = -3875.570983</math></b>                                                                                                           |



|                                 |                                                                                                 |                                                                                                 |                                                                                             |
|---------------------------------|-------------------------------------------------------------------------------------------------|-------------------------------------------------------------------------------------------------|---------------------------------------------------------------------------------------------|
| <b><i>n</i> = 4</b>             | Ga,-1.5370608861,0.,0.                                                                          | Ga,0.,0.,1.6018796304                                                                           | Ga,0.0144054548,-0.0145097848,                                                              |
|                                 | Ga,1.5370608861,0.,0.                                                                           | Ga,0.,0.,-1.6018796304                                                                          | -0.0100877513                                                                               |
|                                 | Te,0.,2.0461473089,0.                                                                           | Te,0.,2.0228529281,0.                                                                           | Te,2.70412703,0.0837678464,                                                                 |
|                                 | Te,0.,-2.0461473089,0.                                                                          | Te,0.,-2.0228529281,0.                                                                          | 0.0582385709                                                                                |
|                                 | Te,-4.0376555072,0.,0.                                                                          | Te,0.,0.,4.0613319528                                                                           | Te,-1.3980875036,2.1832731911,                                                              |
|                                 | Te,4.0376555072,0.,0.                                                                           | Te,0.,0.,-4.0613319528                                                                          | -0.1357697328                                                                               |
|                                 |                                                                                                 |                                                                                                 | Ga,1.7519751144,-1.7646637859,                                                              |
|                                 |                                                                                                 |                                                                                                 | -1.2268610431                                                                               |
|                                 |                                                                                                 |                                                                                                 | Te,-0.6450035956,-2.1578044714,                                                             |
|                                 |                                                                                                 |                                                                                                 | -1.500187319                                                                                |
|                                 |                                                                                                 |                                                                                                 | Te,-1.3980874987,                                                                           |
|                                 |                                                                                                 |                                                                                                 | 0.6331531008, 2.0938558721                                                                  |
| <b><i>v/cm</i><sup>-1</sup></b> | 287 (a <sub>g</sub> ), 268 (b <sub>1u</sub> ), 255 (b <sub>2u</sub> ), 203 (b <sub>3g</sub> ),  | 297 (a <sub>g</sub> ), 237 (b <sub>2u</sub> ), 236 (b <sub>1u</sub> ), 187 (b <sub>3g</sub> ),  | 317 (b <sub>2</sub> ), 282 (a <sub>1</sub> ), 216 (a <sub>1</sub> ), 198 (a <sub>1</sub> ), |
|                                 | 157 (a <sub>g</sub> ), 129 (b <sub>1u</sub> ), 95 (b <sub>3u</sub> ), 80 (b <sub>2g</sub> ), 77 | 157 (a <sub>g</sub> ), 123 (b <sub>1u</sub> ), 97 (b <sub>3u</sub> ), 85 (b <sub>2g</sub> ), 78 | 155 (a <sub>1</sub> ), 138 (b <sub>1</sub> ), 120 (a <sub>1</sub> ), 92 (a <sub>1</sub> ),  |
|                                 | (a <sub>g</sub> ), 46 (b <sub>3g</sub> ), 32 (b <sub>2u</sub> ), 12 (b <sub>3u</sub> )          | (a <sub>g</sub> ), 51 (b <sub>3g</sub> ), 31 (b <sub>2u</sub> ), 16 (b <sub>3u</sub> )          | 68 (b <sub>1</sub> ), 43 (b <sub>2</sub> ), 41 (b <sub>1</sub> ), 35 (a <sub>2</sub> )      |
|                                 | <b><i>E</i> = -3884.093535</b>                                                                  | <b><i>E</i> = -3884.243145</b>                                                                  | <b><i>E</i> = -3883.816615</b>                                                              |

---

**Table S3:** Internal coordinates of the ground state geometries, harmonic vibrational wavenumbers ( $\text{cm}^{-1}$ ), and energies (Hartree) at the B3PW91 functional for  $\text{GaTe}_n$  ( $n = 1-4$ ) [Basis sets Ga: 6-311+G(2df) and Te: LANL2DZdp].

|                     | <b>GaTe<sub>n</sub></b>                                                                                                                                                                                                                                                   |                                                                                                                                                                                                                                                                                                                                                         |                                                                                                                                                                                                                                                                                                                                      |
|---------------------|---------------------------------------------------------------------------------------------------------------------------------------------------------------------------------------------------------------------------------------------------------------------------|---------------------------------------------------------------------------------------------------------------------------------------------------------------------------------------------------------------------------------------------------------------------------------------------------------------------------------------------------------|--------------------------------------------------------------------------------------------------------------------------------------------------------------------------------------------------------------------------------------------------------------------------------------------------------------------------------------|
|                     | <b>Neutral</b>                                                                                                                                                                                                                                                            | <b>Anion</b>                                                                                                                                                                                                                                                                                                                                            | <b>Cation</b>                                                                                                                                                                                                                                                                                                                        |
| <b><i>n</i> = 1</b> | Ga,0.,0.,-1.2612328796<br>Te,0.,0.,1.1469938796<br><b>v/cm<sup>-1</sup></b> 257 ( $\sigma_g$ )<br><b><i>E</i> = -1932.923074</b>                                                                                                                                          | Ga,0.,0.,-1.302035904<br>Te,0.,0.,1.187796904<br><b>v/cm<sup>-1</sup></b> 250 ( $\sigma_g$ )<br><b><i>E</i> = -1933.02045</b>                                                                                                                                                                                                                           | Ga,0.,0.,-1.3845514819<br>Te,0.,0.,1.2703124819<br><b>v/cm<sup>-1</sup></b> 147 ( $\sigma_g$ )<br><b><i>E</i> = -1932.620031</b>                                                                                                                                                                                                     |
| <b><i>n</i> = 2</b> | Ga,0.0157619826,0.0070226778,0.<br>Te,2.8604717989,-0.183466952,0.<br>Te,1.7764889207,2.2494545916,0.<br><b>v/cm<sup>-1</sup></b> 227 (a <sub>1</sub> ), 168 (a <sub>1</sub> ), 103 (b <sub>2</sub> )<br><b><i>E</i> = -1941.0617802</b>                                  | Ga,0.,0.,0.<br>Te,2.4004966503,0.,0.<br>Te,-2.4004966503,0.,0.<br><b>v/cm<sup>-1</sup></b> 360 ( $\sigma_u$ ), 167 ( $\sigma_g$ ), 81 ( $\pi_u$ ), 81 ( $\pi_u$ )<br><b><i>E</i> = -1941.182666</b>                                                                                                                                                     | Ga,2.0203758826,-1.0285085396,0.<br>Te,-1.9527134144,-0.3109684262,0.<br>Te,0.1064665319,1.2559199658,0.<br><b>v/cm<sup>-1</sup></b> 245 (a <sub>1</sub> ), 114 (a <sub>1</sub> ), 22 (a <sub>1</sub> )<br><b><i>E</i> = -1940.775193</b>                                                                                            |
| <b><i>n</i> = 3</b> | Ga,0,-0.5722543721,-0.0887133288,0.<br>Te,0,-2.8998354976,-0.4845375999,0.<br>Te,0,1.4659119818,1.6329244108,0.<br>Te,0,1.922653448,-1.033030332,0.<br><b>v/cm<sup>-1</sup></b> 340 (a'), 219 (a'), 126 (a'), 84(a''), 72 (a'), 47 (a')<br><b><i>E</i> = -1949.166763</b> | Ga,0,-0.1424849099,0.,-0.1393611272<br>Te,0,0.4164553095,0.,2.3993693864<br>Te,0,2.4080102444,0.,0.363173705<br>Te,0,-1.8672464268,0.,-1.8263096568<br><b>v/cm<sup>-1</sup></b> 329(a <sub>1</sub> ), 185 (a <sub>1</sub> ), 143 (b <sub>2</sub> ), 126 (a <sub>1</sub> ), 82 (b <sub>1</sub> ), 60 (b <sub>2</sub> )<br><b><i>E</i> = -1949.291842</b> | Ga,0,0.,0.,-0.5387115679<br>Te,0,0.,0.,-2.9814906072<br>Te,0,0.,1.3622119398,1.6512349076<br>Te,0,0.,-1.3622119398,1.6512349076<br><b>v/cm<sup>-1</sup></b> 326 (a <sub>1</sub> ), 210 (a <sub>1</sub> ), 146 (b <sub>2</sub> ), 130 (a <sub>1</sub> ), 66 (b <sub>1</sub> ), 40 (b <sub>2</sub> )<br><b><i>E</i> = -1948.898948</b> |
| <b><i>n</i> = 4</b> | Ga,0.,0.,0.9035962431<br>Te,0.,1.9759128156,-0.7599022274<br>Te,0.,0.,-2.6597336602<br>Te,0.,-1.9759128156,-0.7599022274<br>Te,0.,0.,3.3477517718                                                                                                                         | Ga,0.,0.,0.9634209388<br>Te,0.,1.9684966417,-0.7695837605<br>Te,0.,0.,-2.7345659914<br>Te,0.,-1.9684966417,-0.7695837605<br>Te,0.,0.,3.3821224737                                                                                                                                                                                                       | Ga,0.,0.,0.<br>Te,0.,1.3628261869,2.2059428792<br>Te,0.,-1.3628261869,2.2059428792<br>Te,1.3628261869,0.,-2.2059428792<br>Te,-1.3628261869,0.,-2.2059428792                                                                                                                                                                          |

|                          |                                                                                                                                                                                                              |                                                                                                                                                                                                                 |                                                                                                                                                          |
|--------------------------|--------------------------------------------------------------------------------------------------------------------------------------------------------------------------------------------------------------|-----------------------------------------------------------------------------------------------------------------------------------------------------------------------------------------------------------------|----------------------------------------------------------------------------------------------------------------------------------------------------------|
| <b>v/cm<sup>-1</sup></b> | 260 (a <sub>1</sub> ), 215 (b <sub>2</sub> ), 188 (b <sub>2</sub> ), 182 (a <sub>1</sub> ),<br>142 (a <sub>1</sub> ), 89 (a <sub>1</sub> ), 71 (b <sub>1</sub> ), 40 (b <sub>2</sub> ), 32 (b <sub>1</sub> ) | 304 (a <sub>1</sub> ), 194 (b <sub>2</sub> ), 184 (a <sub>1</sub> ), 178 (b <sub>2</sub> ),<br>136 (a <sub>1</sub> ), 85 (a <sub>1</sub> ), 79 (b <sub>1</sub> ), 46 (b <sub>2</sub> ), 25<br>(b <sub>1</sub> ) | 318 (b <sub>2</sub> ), 217 (a <sub>1</sub> ), 200 (b <sub>2</sub> ), 142 (e),<br>142 (e), 109 (a <sub>1</sub> ), 51 (e), 51 (e), 36<br>(b <sub>1</sub> ) |
|                          | <i>E = -1957.293459</i>                                                                                                                                                                                      | <i>E = -1957.413757</i>                                                                                                                                                                                         | <i>E = -1957.033446</i>                                                                                                                                  |

---

**Table S4:** Internal coordinates of the ground state geometries, harmonic vibrational wavenumbers ( $\text{cm}^{-1}$ ), and energies (Hartree) at the B3PW91 functional for  $\text{Ga}_2\text{Te}_n$  ( $n = 1-4$ ) [Basis sets Ga: 6-311+G(2df) and Te: LANL2DZdp].

|                                        | <b><math>\text{Ga}_2\text{Te}_n</math></b>                                                                                                                                     |                                                                                                                                                                           |                                                                                                                                                |
|----------------------------------------|--------------------------------------------------------------------------------------------------------------------------------------------------------------------------------|---------------------------------------------------------------------------------------------------------------------------------------------------------------------------|------------------------------------------------------------------------------------------------------------------------------------------------|
|                                        | <b>Neutral</b>                                                                                                                                                                 | <b>Anion</b>                                                                                                                                                              | <b>Cation</b>                                                                                                                                  |
| <b><math>n = 1</math></b>              | Ga,0.0157619826,0.0070226778,0.<br>Te,2.8604717989,0.183466952,0.<br>Te,1.7764889207,2.2494545916,0.                                                                           | Ga,0.,0.,0.<br>Te,2.4004966503,0.,0.<br>Te,-2.4004966503,0.,0.                                                                                                            | Ga,2.0203758826,-1.0285085396,0.<br>Te,-1.9527134144,-0.3109684262,0.<br>Te,0.1064665319,1.2559199658,0.                                       |
| <b><math>\nu/\text{cm}^{-1}</math></b> | 202 ( $b_2$ ), 194 ( $a_1$ ), 37 ( $a_1$ )                                                                                                                                     | 203 ( $a_1$ ), 140 ( $b_2$ ), 103 ( $a_1$ )                                                                                                                               | 159 ( $a_1$ ), 127 ( $a_1$ ), 39 ( $a_1$ )                                                                                                     |
|                                        | <b><math>E = -3857.813688</math></b>                                                                                                                                           | <b><math>E = -3857.864815</math></b>                                                                                                                                      | <b><math>E = -3857.532582</math></b>                                                                                                           |
| <b><math>n = 2</math></b>              | Ga,0.,2.0234047861,0.7557533179<br>Te,-1.3882895013,0.,-0.6962083179<br>Te,1.3882895013,0.,-0.6962083179<br>Ga,0.,-2.0234047861,0.7557533179                                   | Ga,0.,0.,-1.6629136436<br>Te,0.,2.1050849619,0.<br>Te,0.,-2.1050849619,0.<br>Ga,0.,0.,1.6629136436                                                                        | Ga,0.1355335239,-0.1779061694,0.<br>Te,6.1956609906,-0.1825957521,0.<br>Te,1.9285989788,2.1275351909,0.<br>Ga,4.0278948367,0.9539826606,0.     |
| <b><math>\nu/\text{cm}^{-1}</math></b> | 205 ( $a_1$ ), 170 ( $b_2$ ), 155 ( $a_1$ ), 118 ( $b_1$ ),<br>87 ( $a_2$ ), 49 ( $a_1$ )                                                                                      | 193 ( $b_{1u}$ ), 178 ( $a_g$ ), 149 ( $b_{3g}$ ), 92 ( $a_g$ ),<br>40 ( $b_{2u}$ ), 40 ( $b_{3u}$ )                                                                      | 342 ( $a'$ ), 158 ( $a'$ ), 126 ( $a'$ ), 73 ( $a'$ ), 64<br>( $a''$ ), 28 ( $a'$ )                                                            |
|                                        | <b><math>E = -3865.944712</math></b>                                                                                                                                           | <b><math>E = -3866.033037</math></b>                                                                                                                                      | <b><math>E = -3865.663509</math></b>                                                                                                           |
| <b><math>n = 3</math></b>              | Te,0.0459928506,0.,0.0525094661<br>Ga,-0.0600717752,0.,-2.5698512671<br>Ga,2.5553678212,0.,0.2789972258<br>Te,-0.2219904599,0.,4.8951096133<br>Te,4.8816914777,0.,0.4248131444 | Ga,0.0000000002,0.,-0.1445644472<br>Ga,0.0000000002,0.,3.0258167605<br>Te,2.08315598,0.,1.391798191<br>Te,-2.0831559797,0.,1.391798191<br>Te,0.0000000002,0.,5.4553741846 | Ga,0.,0.,0.1565191042<br>Ga,0.,0.,2.9042381996<br>Te,2.1546952717,0.,1.3413701381<br>Te,-2.1546952717,0.,1.3413701381<br>Te,0.,0.,5.3767252843 |
| <b><math>\nu/\text{cm}^{-1}</math></b> | 370 ( $a_1$ ), 360 ( $b_2$ ), 161 ( $a_1$ ), 151 ( $b_2$ ),<br>84 ( $a_1$ ), 68 ( $b_1$ ), 62 ( $a_2$ ), 55 ( $b_2$ ), 14 ( $a_1$ )                                            | 292 ( $a_1$ ), 234 ( $b_2$ ), 190 ( $a_1$ ), 157 ( $b_2$ ),<br>130 ( $a_1$ ), 91 ( $b_1$ ), 81 ( $a_1$ ), 44 ( $b_2$ ),<br>32 ( $a_1$ )                                   | 309 ( $b_2$ ), 294 ( $a_1$ ), 209 ( $a_1$ ), 165 ( $b_2$ ),<br>123 ( $a_1$ ), 108 ( $a_1$ ), 84 ( $b_1$ ), 49 ( $b_1$ ),<br>38 ( $b_2$ )       |
|                                        | <b><math>E = -3874.058469</math></b>                                                                                                                                           | <b><math>E = -3874.175275</math></b>                                                                                                                                      | <b><math>E = -3873.797546</math></b>                                                                                                           |

|                                 |                                                                                                                                                                                                                                                                                                                               |                                                                                                                                                                                                                                                                                                                               |                                                                                                                                                                                                                                                                                                                      |
|---------------------------------|-------------------------------------------------------------------------------------------------------------------------------------------------------------------------------------------------------------------------------------------------------------------------------------------------------------------------------|-------------------------------------------------------------------------------------------------------------------------------------------------------------------------------------------------------------------------------------------------------------------------------------------------------------------------------|----------------------------------------------------------------------------------------------------------------------------------------------------------------------------------------------------------------------------------------------------------------------------------------------------------------------|
| <b><i>n</i> = 4</b>             | Ga,-1.5375504669,0.,0.<br>Ga,1.5375504669,0.,0.<br>Te,0.,2.0511740011,0.<br>Te,0.,-2.0511740011,0.<br>Te,-4.0446988693,0.,0.<br>Te,4.0446988693,0.,0.                                                                                                                                                                         | Ga,0.,0.,1.6034629475<br>Ga,0.,0.,-1.6034629475<br>Te,0.,2.0275162757,0.<br>Te,0.,-2.0275162757,0.<br>Te,0.,0.,4.0683324907<br>Te,0.,0.,-4.0683324907                                                                                                                                                                         | Ga,0.014167858,-0.0142704672,<br>-0.0099213686<br>Te,2.7093840324,0.0834449452,<br>0.0580140778<br>Te,-1.401584011,2.187180148,<br>-0.1338751711<br>Ga,1.7547464538,-1.7674551968,<br>-1.2288017376<br>Te,-0.6456780572,-2.1620973,<br>-1.5031718559<br>Te,-1.4015840062,0.6362898057,<br>2.0968583307               |
| <b><i>v/cm</i><sup>-1</sup></b> | 277 (a <sub>g</sub> ), 239 (b <sub>2u</sub> ), 236 (b <sub>1u</sub> ), 199 (b <sub>3g</sub> ),<br>158 (a <sub>g</sub> ), 126 (b <sub>1u</sub> ), 94 (b <sub>3u</sub> ), 78 (a <sub>g</sub> ),<br>69 (b <sub>2g</sub> ), 48 (b <sub>3g</sub> ), 23 (b <sub>2u</sub> ), 19 (b <sub>3u</sub> )<br><b><i>E</i> = -3882.187574</b> | 295 (a <sub>g</sub> ), 237 (b <sub>2u</sub> ), 233 (b <sub>1u</sub> ), 187 (b <sub>3g</sub> ),<br>156 (a <sub>g</sub> ), 123 (b <sub>1u</sub> ), 97 (b <sub>3u</sub> ), 85 (b <sub>2g</sub> ),<br>77 (a <sub>g</sub> ), 51 (b <sub>3g</sub> ), 31 (b <sub>2u</sub> ), 16 (b <sub>3u</sub> )<br><b><i>E</i> = -3882.316546</b> | 316 (b <sub>2</sub> ), 282 (a <sub>1</sub> ), 216 (a <sub>1</sub> ), 198 (a <sub>1</sub> ),<br>154 (b <sub>2</sub> ), 137 (b <sub>1</sub> ), 120 (a <sub>1</sub> ), 92 (a <sub>1</sub> ),<br>68 (b <sub>1</sub> ), 43 (b <sub>2</sub> ), 41 (b <sub>1</sub> ), 35 (a <sub>2</sub> )<br><b><i>E</i> = -3881.93023</b> |

---

**Table S5:** Internal coordinates of the ground state geometries, harmonic vibrational wavenumbers ( $\text{cm}^{-1}$ ), and energies (Hartree) at the B3LYP functional for  $\text{GaTe}_n$  ( $n = 1-4$ ) [Basis sets Ga: 6-311+G(2df) and Te: LANL2DZdp].

|                          |                                                                                      | <b>GaTe<sub>n</sub></b>                                                                   |                                                                                           |                                            |
|--------------------------|--------------------------------------------------------------------------------------|-------------------------------------------------------------------------------------------|-------------------------------------------------------------------------------------------|--------------------------------------------|
|                          |                                                                                      | <b>Neutral</b>                                                                            | <b>Anion</b>                                                                              | <b>Cation</b>                              |
| <b>n = 1</b>             |                                                                                      | Ga,0,0.,0.,-1.2733650397                                                                  | Ga,0,0.,0.,-1.3091934505                                                                  | Ga,0,0.,0.,-1.4200131681                   |
|                          |                                                                                      | Te,0,0.,0.,1.1591260397                                                                   | Te,0,0.,0.,1.1949544505                                                                   | Te,0,0.,0.,1.3057741681                    |
|                          | <b>v/cm<sup>-1</sup></b>                                                             | 242 ( $\sigma_g$ )                                                                        | 242 ( $\sigma_g$ )                                                                        | 125 ( $\sigma_g$ )                         |
|                          |                                                                                      | <b><i>E = -1932.937167</i></b>                                                            | <b><i>E = -1933.035322</i></b>                                                            | <b><i>E = -1932.636996</i></b>             |
| <b>n = 2</b>             |                                                                                      | Ga,0,-0.0041576161,-0.0018524559,0.                                                       | Ga,0,0.,0.,0.                                                                             | Ga,0,2.1044479558,1.0323353362,0.          |
|                          |                                                                                      | Te,0,2.8738124499,-0.1866174633,0.                                                        | Te,0,2.4127294192,0.,0.                                                                   | Te,0,-2.0256524641,0.2784119926,0.         |
|                          |                                                                                      | Te,0,1.7830678684,2.2614802366,0.                                                         | Te,0,-2.4127294192,0.,0.                                                                  | Te,0,0.0953335083,1.2271903288,0.          |
|                          | <b>v/cm<sup>-1</sup></b>                                                             | 218 ( $a_1$ ), 160 ( $a_1$ ), 94 ( $b_2$ )                                                | 351 ( $\sigma_u$ ), 162 ( $\sigma_g$ ), 79 ( $\pi_u$ ), 79 ( $\pi_u$ )                    | 236 ( $a_1$ ), 110 ( $a_1$ ), 28 ( $a_1$ ) |
|                          | <b><i>E = -1941.0504531</i></b>                                                      | <b><i>E = -1941.169292</i></b>                                                            | <b><i>E = -1940.769161</i></b>                                                            |                                            |
| <b>n = 3</b>             |                                                                                      | Ga,0,0.0506596149,0.0299569366,<br>0.0199197691                                           | Ga,0,-0.0144304653,-0.00879102,0.                                                         | Ga,0,0.0096988147,0.0043395032,0.          |
|                          |                                                                                      | Te,0,2.6203100804,0.1727901517,<br>0.0141674593                                           | Te,0,2.6020278327,-0.0982342433,0.                                                        | Te,0,2.5831378016,-0.3463701434,0.         |
|                          |                                                                                      | Te,0,-2.077620005,1.1479296097,<br>-0.0074266011                                          | Te,0,1.1061492657,2.3572510722,0.                                                         | Te,0,1.4631581853,2.1567895801,0.          |
|                          |                                                                                      | Te,0,1.258767979,-2.293033048,<br>-0.2314836523                                           | Te,0,-2.086159209,-1.2708855659,0.                                                        | Te,0,-2.2322735814,<br>-0.9987780207,0.    |
| <b>v/cm<sup>-1</sup></b> | 278 ( $a'$ ), 165 ( $a'$ ), 147 ( $a''$ ), 94 ( $a'$ ), 71 ( $a'$ ),<br>47 ( $a''$ ) | 318 ( $a_1$ ), 176 ( $a_1$ ), 135 ( $b_2$ ), 121 ( $a_1$ ),<br>81 ( $b_1$ ), 59 ( $b_2$ ) | 315 ( $a_1$ ), 201 ( $a_1$ ), 137 ( $b_2$ ), 125 ( $a_1$ ),<br>66 ( $b_1$ ), 40 ( $b_2$ ) |                                            |
|                          | <b><i>E = -1949.128321</i></b>                                                       | <b><i>E = -1949.249973</i></b>                                                            | <b><i>E = -1948.85986</i></b>                                                             |                                            |

|                                        |                                                                                                                                                                                                              |                                                                                                                                                                                                                 |                                                                                                                                                          |
|----------------------------------------|--------------------------------------------------------------------------------------------------------------------------------------------------------------------------------------------------------------|-----------------------------------------------------------------------------------------------------------------------------------------------------------------------------------------------------------------|----------------------------------------------------------------------------------------------------------------------------------------------------------|
| <b><math>n = 4</math></b>              | Ga,0,0.,0.,0.9172107419                                                                                                                                                                                      | Ga,0,0.,0.,0.9766748764                                                                                                                                                                                         | Ga,0,0.,0.,0.                                                                                                                                            |
|                                        | Te,0,0.,1.9858667992,-0.7669890476                                                                                                                                                                           | Te,0,0.,1.9818553213,-0.7761903516                                                                                                                                                                              | Te,0,0.,1.3722590855,2.222151623                                                                                                                         |
|                                        | Te,0,0.,0.,-2.6854436915                                                                                                                                                                                     | Te,0,0.,0.,-2.7603587707                                                                                                                                                                                        | Te,0,0.,-1.3722590855,2.222151623                                                                                                                        |
|                                        | Te,0,0.,-1.9858667992,-0.7669890476                                                                                                                                                                          | Te,0,0.,-1.9818553213,-0.7761903516                                                                                                                                                                             | Te,0,1.3722590855,0.,-2.222151623                                                                                                                        |
|                                        | Te,0,0.,0.,3.3740209447                                                                                                                                                                                      | Te,0,0.,0.,3.4078744975                                                                                                                                                                                         | Te,0,-1.3722590855,0.,-2.222151623                                                                                                                       |
| <b><math>\nu/\text{cm}^{-1}</math></b> | 252 (a <sub>1</sub> ), 205 (b <sub>2</sub> ), 179 (b <sub>2</sub> ), 175 (a <sub>1</sub> ),<br>137 (a <sub>1</sub> ), 89 (a <sub>1</sub> ), 70 (b <sub>1</sub> ), 40 (b <sub>2</sub> ), 31 (b <sub>1</sub> ) | 295 (a <sub>1</sub> ), 184 (b <sub>2</sub> ), 175 (a <sub>1</sub> ), 170 (b <sub>2</sub> ),<br>131 (a <sub>1</sub> ), 85 (a <sub>1</sub> ), 78 (b <sub>1</sub> ), 46 (b <sub>2</sub> ), 24<br>(b <sub>1</sub> ) | 306 (b <sub>2</sub> ), 208 (a <sub>1</sub> ), 193 (b <sub>2</sub> ), 133 (e),<br>133 (e), 105 (a <sub>1</sub> ), 51 (e), 51 (e), 35<br>(b <sub>1</sub> ) |
|                                        | <b><math>E = -1957.22703</math></b>                                                                                                                                                                          | <b><math>E = -1957.34623</math></b>                                                                                                                                                                             | <b><math>E = -1956.964773</math></b>                                                                                                                     |

---

**Table S6:** Internal coordinates of the ground state geometries, harmonic vibrational wavenumbers ( $\text{cm}^{-1}$ ), and energies (Hartree) at the B3LYP functional for  $\text{Ga}_2\text{Te}_n$  ( $n = 1-4$ ) [Basis sets Ga: 6-311+G(2df) and Te: LANL2DZdp].

|                                        | <b><math>\text{Ga}_2\text{Te}_n</math></b>                                                                                                                                              |                                                                                                                                                                                         |                                                                                                                                                         |
|----------------------------------------|-----------------------------------------------------------------------------------------------------------------------------------------------------------------------------------------|-----------------------------------------------------------------------------------------------------------------------------------------------------------------------------------------|---------------------------------------------------------------------------------------------------------------------------------------------------------|
|                                        | <b>Neutral</b>                                                                                                                                                                          | <b>Anion</b>                                                                                                                                                                            | <b>Cation</b>                                                                                                                                           |
| <b><math>n = 1</math></b>              | Te,0,-0.0855373005,-0.1312623137,0.<br>Ga,0,2.5609213319,0.0049543413,0.<br>Ga,0,-1.0297052913,2.3447920224,0.                                                                          | Te,0,-0.1705117925,-0.1267939596,0.<br>Ga,0,2.5374240494,0.088016337,0.<br>Ga,0,0.8147358084,2.4046773817,0.                                                                            | Te,0,-0.0463084024,-0.1321450033,0.<br>Ga,0,2.9171255201,-0.0172310404,0.<br>Ga,0,-1.0618532378,2.2261334037,0.                                         |
| <b><math>\nu/\text{cm}^{-1}</math></b> | 196 ( $b_2$ ), 187 ( $a_1$ ), 37 ( $a_1$ )                                                                                                                                              | 194 ( $a_1$ ), 133 ( $b_2$ ), 91 ( $a_1$ )                                                                                                                                              | 159 ( $a_1$ ), 123 ( $a_1$ ), 30 ( $a_1$ )                                                                                                              |
|                                        | <b><math>E = -3857.866157</math></b>                                                                                                                                                    | <b><math>E = -3857.911955</math></b>                                                                                                                                                    | <b><math>E = -3857.586191</math></b>                                                                                                                    |
| <b><math>n = 2</math></b>              | Ga,0,0.,2.0584358799,0.7585660949<br>Te,0,-1.3992351736,0.,-0.6990210949<br>Te,0,1.3992351736,0.,-0.6990210949<br>Ga,0,0.,-2.0584358799,0.7585660949                                    | Ga,0,0.,0.,-1.6875503794<br>Te,0,0.,2.1264916151,0.<br>Te,0,0.,-2.1264916151,0.<br>Ga,0,0.,0.,1.6875503794                                                                              | Ga,0,0.0689974265,-0.17378416,0.<br>Te,0,6.2371699912,-0.1722248249,0.<br>Te,0,1.9327159006,2.1184963302,0.<br>Ga,0,4.0488050117,0.9485285848,0.        |
| <b><math>\nu/\text{cm}^{-1}</math></b> | 195 ( $a_1$ ), 162 ( $b_2$ ), 148 ( $a_1$ ), 109 ( $b_1$ ),<br>77 ( $a_2$ ), 48 ( $a_1$ )                                                                                               | 179 ( $b_{1u}$ ), 170 ( $a_g$ ), 136 ( $b_{3g}$ ), 90 ( $a_g$ ),<br>52 ( $b_{2u}$ ), 42 ( $b_{3u}$ )                                                                                    | 324 ( $a'$ ), 151 ( $a'$ ), 126 ( $a'$ ), 75 ( $a'$ ),<br>59 ( $a''$ ), 24 ( $a'$ )                                                                     |
|                                        | <b><math>E = -3865.966584</math></b>                                                                                                                                                    | <b><math>E = -3866.053104</math></b>                                                                                                                                                    | <b><math>E = -3865.690747</math></b>                                                                                                                    |
| <b><math>n = 3</math></b>              | Te,0,0.0792146787,0.,0.0904384145<br>Ga,0,-0.0972181165,0.,2.6205665117<br>Ga,0,2.6105346262,0.,0.2488557209<br>Te,0,-0.3427510497,0.,4.9491905626<br>Te,0,4.9512097755,0.,0.3122295071 | Ga,0,0.0000000002,0.,-0.1820130873<br>Ga,0,0.0000000002,0.,3.0417422927<br>Te,0,2.0951428101,0.,1.3874523221<br>Te,0,-2.0951428097,0.,1.3874523221<br>Te,0,0.0000000002,0.,5.4855890189 | Ga,0,0.,0.,0.129110857<br>Ga,0,0.,0.,2.9197501446<br>Te,0,2.1637007314,0.,1.3322375037<br>Te,0,-2.1637007314,0.,1.3322375037<br>Te,0,0.,0.,5.4068868397 |
| <b><math>\nu/\text{cm}^{-1}</math></b> | 359 ( $a_1$ ), 350 ( $b_2$ ), 154 ( $a_1$ ), 147 ( $b_2$ ),<br>84 ( $a_1$ ), 66 ( $b_1$ ), 61 ( $a_2$ ), 56 ( $b_2$ ), 15 ( $a_1$ )                                                     | 281 ( $a_1$ ), 219 ( $b_2$ ), 178 ( $a_1$ ), 144 ( $b_2$ ),<br>125 ( $a_1$ ), 89 ( $b_1$ ), 80 ( $a_1$ ), 41 ( $b_2$ ), 32<br>( $b_1$ )                                                 | 298 ( $b_2$ ), 284 ( $a_1$ ), 200 ( $a_1$ ), 154 ( $b_2$ ),<br>118 ( $a_1$ ), 104 ( $a_1$ ), 83 ( $b_1$ ), 49 ( $b_1$ ), 38<br>( $b_2$ )                |
|                                        | <b><math>E = -3874.054184</math></b>                                                                                                                                                    | <b><math>E = -3874.165272</math></b>                                                                                                                                                    | <b><math>E = -3873.788824</math></b>                                                                                                                    |



|                                        |                                                                                                                                                                                                               |                                                                                                                                                                                                                  |                                                                                                                                                                                                                                                                                                                         |
|----------------------------------------|---------------------------------------------------------------------------------------------------------------------------------------------------------------------------------------------------------------|------------------------------------------------------------------------------------------------------------------------------------------------------------------------------------------------------------------|-------------------------------------------------------------------------------------------------------------------------------------------------------------------------------------------------------------------------------------------------------------------------------------------------------------------------|
| <b><math>n = 4</math></b>              | Ga,0,-1.563132217,0.,0.<br>Ga,0,1.563132217,0.,0.<br>Te,0,0.,2.0548853409,0.<br>Te,0,0.,-2.0548853409,0.<br>Te,0,-4.0841802999,0.,0.<br>Te,0,4.0841802999,0.,0.                                               | Ga,0,0.,0.,1.6278342852<br>Ga,0,0.,0.,-1.6278342852<br>Te,0,0.,2.0332956281,0.<br>Te,0,0.,-2.0332956281,0.<br>Te,0,0.,0.,4.1064751857<br>Te,0,0.,0.,-4.1064751857                                                | Ga,0,0.0075895135,-0.007644479,<br>-0.0053147308<br>Te,0,2.7276120555,0.0774188814,<br>0.0538245302<br>Te,0,-1.4192642398,2.2102757456,<br>-0.1290992345<br>Ga,0,1.7757527746,-1.7886136558,<br>-1.2435118989<br>Te,0,-0.6421636218,-2.1779711644,<br>-1.5142079671<br>Te,0,-1.4192642348,0.6488107635,<br>2.1168443712 |
| <b><math>\nu/\text{cm}^{-1}</math></b> | 276 ( $a_g$ ), 258 ( $b_{1u}$ ), 244 ( $b_{2u}$ ), 193 ( $b_{3g}$ ),<br>152 ( $a_g$ ), 124 ( $b_{1u}$ ), 94 ( $b_{3u}$ ), 79 ( $b_{2g}$ ), 77<br>( $a_g$ ), 47 ( $b_{3g}$ ), 33 ( $b_{2u}$ ), 13 ( $b_{3u}$ ) | 286 ( $a_g$ ), 227 ( $b_{2u}$ ), 226 ( $b_{1u}$ ), 177<br>( $b_{3g}$ ), 151 ( $a_g$ ), 118 ( $b_{1u}$ ), 96 ( $b_{3u}$ ), 84<br>( $b_{2g}$ ), 77 ( $a_g$ ), 52 ( $b_{3g}$ ), 33 ( $b_{2u}$ ), 16<br>( $b_{3u}$ ) | 305 ( $b_2$ ), 271 ( $a_1$ ), 207 ( $a_1$ ), 190 ( $a_1$ ),<br>143 ( $a_1$ ), 128 ( $b_1$ ), 116 ( $a_1$ ), 89 ( $a_1$ ), 67<br>( $b_1$ ), 43 ( $b_2$ ), 41 ( $b_1$ ), 34 ( $a_2$ )                                                                                                                                     |
|                                        | <b><math>E = -3882.152755</math></b>                                                                                                                                                                          | <b><math>E = -3882.281229</math></b>                                                                                                                                                                             | <b><math>E = -3881.891928</math></b>                                                                                                                                                                                                                                                                                    |

---

**Table S7:** Internal coordinates of the ground state geometries, harmonic vibrational wavenumbers ( $\text{cm}^{-1}$ ), and energies (Hartree) with the MP2 level for  $\text{GaTe}_n$  ( $n = 1-4$ ) [Basis sets Ga: 6-311+G(2df) and Te: LANL2DZdp].

|                     | <b>GaTe<sub>n</sub></b>                                                                                                                                                                                                                                                                                     |                                                                                                                                                                                                                                                                                    |                                                                                                                                                                                                                                                                                      |
|---------------------|-------------------------------------------------------------------------------------------------------------------------------------------------------------------------------------------------------------------------------------------------------------------------------------------------------------|------------------------------------------------------------------------------------------------------------------------------------------------------------------------------------------------------------------------------------------------------------------------------------|--------------------------------------------------------------------------------------------------------------------------------------------------------------------------------------------------------------------------------------------------------------------------------------|
|                     | <b>Neutral</b>                                                                                                                                                                                                                                                                                              | <b>Anion</b>                                                                                                                                                                                                                                                                       | <b>Cation</b>                                                                                                                                                                                                                                                                        |
| <b><i>n</i> = 1</b> | Ga,0.,0.,-1.2366563355<br>Te,0.,0.,1.1224173355<br><b><i>v/cm</i><sup>-1</sup></b> 301 ( $\sigma_g$ )<br><b><i>E</i> = -1931.407474</b>                                                                                                                                                                     | Ga,0.,0.,-1.2840715309<br>Te,0.,0.,1.1698325309<br>270 ( $\sigma_g$ )<br><b><i>E</i> = -1931.498509</b>                                                                                                                                                                            | Ga,0.,0.,-1.3658114171<br>Te,0.,0.,1.2515724171<br>148 ( $\sigma_g$ )<br><b><i>E</i> = -1931.11059</b>                                                                                                                                                                               |
| <b><i>n</i> = 2</b> | Ga,0.0603215288,0.0268760863,0.<br>Te,2.8418201883,-0.2015368058,0.<br>Te,1.7505809851,2.2476710369,0.<br><b><i>v/cm</i><sup>-1</sup></b> 299 ( $a_1$ ), 226 ( $a_1$ ), 178 ( $b_2$ )<br><b><i>E</i> = -1939.4200812</b>                                                                                    | Ga,0.,0.,0.<br>Te,2.380792447,0.,0.<br>Te,-2.380792447,0.,0.<br>383 ( $\sigma_u$ ), 180 ( $\sigma_g$ ), 83 ( $\pi_u$ ), 83 ( $\pi_u$ )<br><b><i>E</i> = -1939.550661</b>                                                                                                           | Ga,1.8884954872,-1.022829965,0.<br>Te,-1.8397879234,-0.3635956037,0.<br>Te,0.1254214362,1.3028685688,0.<br>285 ( $a_1$ ), 145 ( $a_1$ ), 29 ( $a_1$ )<br><b><i>E</i> = -1939.135826</b>                                                                                              |
| <b><i>n</i> = 3</b> | Ga,0,0.3420671443,0.2025282795,0.<br>Te,0,2.4610529228,1.4489846399,0.<br>Te,0,-0.6640743927,-2.0771105412,0.<br>Te,0,-2.1390456743,0.4255976218,0.<br><b><i>v/cm</i><sup>-1</sup></b> 348 ( $a'$ ), 206 ( $a'$ ), 176 ( $a'$ ), 126 ( $a'$ ), 76 ( $a''$ ), 47 ( $a'$ )<br><b><i>E</i> = -1947.4229709</b> | Ga,0,-0.5545250834,-0.0785795994,0.<br>Te,0,-2.8671108016,-0.4480207436,0.<br>Te,0,1.4535599688,1.6256139424,0.<br>Te,0,1.8845514764,-1.0723704493,0.<br>352 ( $a_1$ ), 186 ( $a_1$ ), 163 ( $b_2$ ), 131 ( $a_1$ ), 87 ( $b_1$ ), 62 ( $b_2$ )<br><b><i>E</i> = -1947.4223543</b> | Ga,0,<br>-0.0000100377,0.5158544103,0.<br>Te,0,-0.0000628096,2.9515408673,0.<br>Te,0,-1.3793936337,-1.62955852,0.<br>Te,0,1.3794665225,-1.6294987462,0.<br>682 ( $b_2$ ), 350 ( $a_1$ ), 203 ( $a_1$ ), 134 ( $a_1$ ), 72 ( $b_1$ ), 51 ( $b_2$ )<br><b><i>E</i> = -1947.1621088</b> |
| <b><i>n</i> = 4</b> | Ga,0,0.,0.,0.<br>Te,0,0.,1.4084805584,2.1239748626<br>Te,0,0.,-1.4084805584,2.1239748626<br>Te,0,1.4084805584,0.,-2.1239748626<br>Te,0,-1.4084805584,0.,-2.1239748626                                                                                                                                       | Ga,0,0.,0.,0.9380157547<br>Te,0,0.,1.964664822,-0.74288137<br>Te,0,0.,0.,-2.7152568217<br>Te,0,0.,-1.964664822,-0.74288137                                                                                                                                                         | Ga,0.,0.,0.<br>Te,0.,1.37879942,2.1694783807<br>Te,0.,-1.37879942,2.1694783807<br>Te,1.37879942,0.,-2.1694783807<br>Te,-1.37879942,0.,-2.1694783807                                                                                                                                  |

|                          |                                                                                                                                                           |                                                                                                                                                                                                                 |                                                                                                                                                           |
|--------------------------|-----------------------------------------------------------------------------------------------------------------------------------------------------------|-----------------------------------------------------------------------------------------------------------------------------------------------------------------------------------------------------------------|-----------------------------------------------------------------------------------------------------------------------------------------------------------|
|                          |                                                                                                                                                           | Te,0,0.,0.,3.3348137069                                                                                                                                                                                         |                                                                                                                                                           |
| <b>v/cm<sup>-1</sup></b> | 5026 (e), 5004 (e), 382 (b <sub>2</sub> ), 208 (b <sub>2</sub> ),<br>195 (a <sub>1</sub> ), 137 (e), 137 (e), 109 (a <sub>1</sub> ), 43 (b <sub>1</sub> ) | 326 (a <sub>1</sub> ), 215 (b <sub>2</sub> ), 186 (a <sub>1</sub> ), 185 (b <sub>2</sub> ),<br>148 (a <sub>1</sub> ), 87 (a <sub>1</sub> ), 87 (b <sub>1</sub> ), 50 (b <sub>2</sub> ), 25<br>(b <sub>1</sub> ) | 1415(e), 1415 (e), 334 (b <sub>2</sub> ), 207 (a <sub>1</sub> ),<br>189 (b <sub>2</sub> ), 112 (a <sub>1</sub> ), 62 (e), 62 (e), 37<br>(b <sub>1</sub> ) |
|                          | <b><i>E = -1955.4271886</i></b>                                                                                                                           | <b><i>E = -1955.537391</i></b>                                                                                                                                                                                  | <b><i>E = -1955.181809</i></b>                                                                                                                            |

---

**Table S8:** Internal coordinates of the ground state geometries, harmonic vibrational wavenumbers ( $\text{cm}^{-1}$ ), and energies (Hartree) with the MP2 level for  $\text{Ga}_2\text{Te}_n$  ( $n = 1-4$ ) [Basis sets Ga: 6-311+G(2df) and Te: LANL2DZdp].

|                                        | <b><math>\text{Ga}_2\text{Te}_n</math></b>                                                                                                                                    |                                                                                                                                                                                         |                                                                                                                                                          |
|----------------------------------------|-------------------------------------------------------------------------------------------------------------------------------------------------------------------------------|-----------------------------------------------------------------------------------------------------------------------------------------------------------------------------------------|----------------------------------------------------------------------------------------------------------------------------------------------------------|
|                                        | <b>Neutral</b>                                                                                                                                                                | <b>Anion</b>                                                                                                                                                                            | <b>Cation</b>                                                                                                                                            |
| <b><math>n = 1</math></b>              | Te,0,-0.1391006558,-0.2134586178,0.<br>Ga,0,2.4462193,0.138250583,0.<br>Ga,0,-0.861439904,2.2936920849,0.                                                                     | Te,0,-0.1556299095,-0.1157276688,0.<br>Ga,0,2.4887352519,0.1379530664,0.<br>Ga,0,0.8485427228,2.3436743615,0.                                                                           | Te,0,-0.14353379,-0.2087336516,0.<br>Ga,0,2.7572154921,0.1469531086,0.<br>Ga,0,0.8047178221,2.1385379029,0.                                              |
| <b><math>\nu/\text{cm}^{-1}</math></b> | 212 ( $b_2$ ), 205 ( $a_1$ ), 37 ( $a_1$ )                                                                                                                                    | 222 ( $a_1$ ), 150 ( $b_2$ ), 116 ( $a_1$ )                                                                                                                                             | 247 ( $a_1$ ), 130 ( $a_1$ ), 44 ( $a_1$ )                                                                                                               |
|                                        | <b><math>E = -3854.89885</math></b>                                                                                                                                           | <b><math>E = -3854.947528</math></b>                                                                                                                                                    | <b><math>E = -3854.621898</math></b>                                                                                                                     |
| <b><math>n = 2</math></b>              | Ga,0,0.,1.9479477762,0.7568236244<br>Te,0,-1.3986868761,0.,-0.6972786244<br>Te,0,1.3986868761,0.,-0.6972786244<br>Ga,0,0.,-1.9479477762,0.7568236244                          | Ga,0,0.,0.,-1.6127512738<br>Te,0,0.,2.0878788901,0.<br>Te,0,0.,-2.0878788901,0.<br>Ga,0,0.,0.,1.6127512738                                                                              | Ga,0,0.3250113726,0.2154392632,0.<br>Te,0,6.0888481489,-0.2306196551,0.<br>Te,0,1.9133735242,2.1900769048,0.<br>Ga,0,3.9604552843,0.9769979436,0.        |
| <b><math>\nu/\text{cm}^{-1}</math></b> | 209 ( $a_1$ ), 178 ( $b_2$ ), 158 ( $a_1$ ), 134 ( $b_1$ ),<br>95 ( $a_2$ ), 52 ( $a_1$ )                                                                                     | 914 ( $b_{2u}$ ), 221 ( $b_{1u}$ ), 196 ( $a_g$ ), 167 ( $b_{3g}$ ),<br>93 ( $a_g$ ), 47 ( $b_{3u}$ )                                                                                   | 372 ( $a'$ ), 167 ( $a'$ ), 140 ( $a'$ ), 80 ( $a'$ ),<br>65 ( $a''$ ), 24 ( $a'$ )                                                                      |
|                                        | <b><math>E = -3862.912699</math></b>                                                                                                                                          | <b><math>E = -3863.004325</math></b>                                                                                                                                                    | <b><math>E = -3862.645467</math></b>                                                                                                                     |
| <b><math>n = 3</math></b>              | Te,-0.0462234305,0.,-0.0527727163<br>Ga,0.0460244149,0.,2.4444656026<br>Ga,2.4170981027,0.,0.3676507728<br>Te,0.0755461699,0.,4.7599818012<br>Te,4.7085446573,0.,0.7019552565 | Ga,0,0.0000000002,0.,-0.0804628427<br>Ga,0,0.0000000002,0.,3.0028313233<br>Te,0,2.0738564649,0.,1.3958661484<br>Te,0,-2.0738564645,0.,1.3958661484<br>Te,0,0.0000000002,0.,5.4061220932 | Ga,0,0.,0.,0.2146846017<br>Ga,0,0.,0.,2.8751447405<br>Te,0,2.1611541876,0.,1.3494178996<br>Te,0,-2.1611541876,0.,1.3494178996<br>Te,0,0.,0.,5.3315577077 |
| <b><math>\nu/\text{cm}^{-1}</math></b> | 394 ( $a_1$ ), 380 ( $b_2$ ), 176 ( $a_1$ ), 155 ( $b_2$ ), 83<br>( $a_1$ ), 73 ( $b_1$ ), 66 ( $a_2$ ), 55 ( $b_2$ ), 18 ( $a_1$ )                                           | 307 ( $a_1$ ), 249 ( $b_2$ ), 204 ( $a_1$ ), 162 ( $b_2$ ),<br>135 ( $a_1$ ), 93 ( $b_1$ ), 85 ( $a_1$ ), 50 ( $b_2$ ), 29<br>( $b_1$ )                                                 | 328 ( $b_2$ ), 317 ( $a_1$ ), 220 ( $a_1$ ), 171 ( $b_2$ ),<br>130 ( $a_1$ ), 114 ( $a_1$ ), 87 ( $b_1$ ), 53 ( $b_1$ ), 40<br>( $b_2$ )                 |
|                                        | <b><math>E = -3870.9370802</math></b>                                                                                                                                         | <b><math>E = -3871.038997</math></b>                                                                                                                                                    | <b><math>E = -3870.682646</math></b>                                                                                                                     |

|                                        |                                                                                                                                                                                                               |                                                                                                                                                                                                               |                                                                                                                                                                                                                                                                                                                    |
|----------------------------------------|---------------------------------------------------------------------------------------------------------------------------------------------------------------------------------------------------------------|---------------------------------------------------------------------------------------------------------------------------------------------------------------------------------------------------------------|--------------------------------------------------------------------------------------------------------------------------------------------------------------------------------------------------------------------------------------------------------------------------------------------------------------------|
| <b><math>n = 4</math></b>              | Ga,0,-1.4833755382,0.,0.<br>Ga,0,1.4833755382,0.,0.<br>Te,0,0.,2.0616459329,0.<br>Te,0,0.,-2.0616459329,0.<br>Te,0,-3.9768912582,0.,0.<br>Te,0,3.9768912582,0.,0.                                             | Ga,0,0.,0.,1.5556482428<br>Ga,0,0.,0.,-1.5556482428<br>Te,0,0.,2.0346648431,0.<br>Te,0,0.,-2.0346648431,0.<br>Te,0,0.,0.,3.9893094887<br>Te,0,0.,0.,-3.9893094887                                             | Ga,0,0.0204960588,-0.0206445,<br>-0.0143528374<br>Te,0,2.7015085328,0.100904876,<br>0.0701528824<br>Te,0,-1.3667260559,2.1618310877,<br>-0.1723255675<br>Ga,0,1.7059140185,-1.7182690927,<br>-1.1946056967<br>Te,0,-0.6649190836,-2.1522443135,<br>-1.4963216868<br>Te,0,1.366726051,0.5914180385,<br>2.0864885504 |
| <b><math>\nu/\text{cm}^{-1}</math></b> | 308 ( $a_g$ ), 284 ( $b_{1u}$ ), 274 ( $b_{2u}$ ), 216 ( $b_{3g}$ ),<br>166 ( $a_g$ ), 134 ( $b_{1u}$ ), 98 ( $b_{3u}$ ), 87 ( $b_{2g}$ ), 78<br>( $a_g$ ), 50 ( $b_{3g}$ ), 36 ( $b_{2u}$ ), 11 ( $b_{3u}$ ) | 346 ( $b_{1u}$ ), 314 ( $a_g$ ), 250 ( $b_{2u}$ ), 199 ( $b_{3g}$ ),<br>165 ( $a_g$ ), 140 ( $b_{1u}$ ), 97 ( $b_{3u}$ ), 90 ( $b_{2g}$ ), 75<br>( $a_g$ ), 50 ( $b_{3g}$ ), 29 ( $b_{2u}$ ), 16 ( $b_{3u}$ ) | 968 ( $b_1$ ), 333 ( $b_2$ ), 303 ( $a_1$ ), 221 ( $a_1$ ),<br>192 ( $a_1$ ), 158 ( $b_2$ ), 125 ( $a_1$ ), 97 ( $a_1$ ),<br>72 ( $b_1$ ), 52 ( $b_1$ ), 44 ( $b_2$ ), 36( $a_2$ )                                                                                                                                 |
|                                        | <b><math>E = -3878.951108</math></b>                                                                                                                                                                          | <b><math>E = -3879.066654</math></b>                                                                                                                                                                          | <b><math>E = -3878.701154</math></b>                                                                                                                                                                                                                                                                               |

---

**Table S9:** Effective NAO electronic configurations (El.conf) and natural charges [q(M)] of gallium atoms in neutral, negatively and positively charged  $\text{Ga}_m\text{Te}_n$  ( $m = 1,2$  and  $n = 1-4$ ) clusters with the B3LYP functional [Basis sets Ga: 6-311+G(2df) and Te: LANL2DZdp]. <sup>[a]</sup>

|                                                 | <i>n</i>                                     |                                              |                                              |                                              |
|-------------------------------------------------|----------------------------------------------|----------------------------------------------|----------------------------------------------|----------------------------------------------|
|                                                 | 1                                            | 2                                            | 3                                            | 4                                            |
| <b>GaTe<sub>n</sub></b>                         |                                              |                                              |                                              |                                              |
| El.conf                                         | $4s^{0.73}4p^{0.27}$                         | $4s^{0.98}4p^{0.35}$                         | $4s^{0.59}4p^{0.81}$                         | $4s^{0.59}4p^{0.84}$                         |
| q(Ga)                                           | 0.49                                         | 0.16                                         | 0.09                                         | 0.05                                         |
| <b>GaTe<sub>n</sub><sup>-</sup></b>             |                                              |                                              |                                              |                                              |
| El.conf                                         | $4s^{1.86}4p^{1.08}$                         | $4s^{1.17}4p^{1.37}$                         | $4s^{1.15}4p^{1.47}$                         | $4s^{1.16}4p^{1.50}$                         |
| q(Ga)                                           | -0.006                                       | 0.43                                         | 0.33                                         | 0.29                                         |
| <b>GaTe<sub>n</sub><sup>+</sup></b>             |                                              |                                              |                                              |                                              |
| El.conf                                         | $4s^{0.83}4p^{0.08}$                         | $4s^{0.98}4p^{0.07}$                         | $4s^{0.61}4p^{0.81}$                         | $4s^{0.57}4p^{0.94}$                         |
| q(Ga)                                           | 0.58                                         | 0.40                                         | 0.06                                         | -0.04                                        |
| <b>Ga<sub>2</sub>Te<sub>n</sub></b>             |                                              |                                              |                                              |                                              |
| El.conf                                         | $4s^{1.93}4p^{0.57}$                         | $4s^{1.95}4p^{0.62}$                         | $4s^{1.20}4p^{1.31}$                         | $4s^{0.59}4p^{0.78}$                         |
| q(Ga)                                           | 0.48                                         | 0.41                                         | 0.46                                         | 0.11                                         |
| <b>Ga<sub>2</sub>Te<sub>n</sub><sup>-</sup></b> |                                              |                                              |                                              |                                              |
| El.conf                                         | $4s^{0.93}4p^{0.34}$                         | $4s^{0.82}4p^{0.49}$                         | $4s^{0.67}4p^{0.42}$<br>$4s^{0.58}4p^{0.75}$ | $4s^{0.58}4p^{0.77}$                         |
| q(Ga)                                           | 0.21                                         | 0.17                                         | (0.39, 0.15)                                 | 0.13                                         |
| <b>Ga<sub>2</sub>Te<sub>n</sub><sup>+</sup></b> |                                              |                                              |                                              |                                              |
| El.conf                                         | $4s^{0.99}4p^{0.12}$<br>$4s^{0.76}4p^{0.14}$ | $4s^{0.99}4p^{0.12}$<br>$4s^{0.62}4p^{0.63}$ | $4s^{0.64}4p^{0.54}$<br>$4s^{0.61}4p^{0.80}$ | $4s^{0.58}4p^{0.93}$<br>$4s^{0.63}4p^{0.54}$ |
| q(Ga)                                           | (0.38, 0.59)                                 | (0.38, 0.23)                                 | (0.31, 0.08)                                 | (-0.03, 0.31)                                |

[a] All values are in *e*.

**Table S10:** ADEs, VDEs, VIPs (eV), HOMO–LUMO gaps (eV) and chemical hardness ( $\eta$ ) of gallium telluride clusters with the B3LYP functional [Basis sets Ga: 6-311+G(2df) and Te: LANL2DZdp].

| <b>Clusters</b>                 | <b>ADE/eV</b> | <b>VDE/eV</b> | <b>VIP/eV</b> | <b>HOMO–LUMO<br/>gaps/eV</b> | <b><math>\eta</math></b> |
|---------------------------------|---------------|---------------|---------------|------------------------------|--------------------------|
| GaTe                            | 2.67          | 2.69          | 8.16          | 3.99                         | 2.74                     |
| GaTe <sub>2</sub>               | 3.42          | 3.42          | 7.65          | 3.83                         | 1.77                     |
| GaTe <sub>3</sub>               | 3.31          | 3.52          | 7.36          | 2.97                         | 1.92                     |
| GaTe <sub>4</sub>               | 3.24          | 3.28          | 7.14          | 2.61                         | 1.93                     |
| Ga <sub>2</sub> Te              | 1.25          | 1.00          | 7.38          | 3.58                         | 3.19                     |
| Ga <sub>2</sub> Te <sub>2</sub> | 2.39          | 2.00          | 7.24          | 3.43                         | 2.62                     |
| Ga <sub>2</sub> Te <sub>3</sub> | 3.34          | 3.66          | 6.82          | 3.31                         | 1.58                     |
| Ga <sub>2</sub> Te <sub>4</sub> | 3.50          | 2.87          | 6.29          | 3.71                         | 1.71                     |
